# Supplementary material for: Identification of Dephospho-Coenzyme A (Dephospho-CoA) Kinase in Thermococcus kodakarensis and Elucidation of the Entire CoA Biosynthesis Pathway in Archaea
Source: PubMed Central journal article supplement (PMC6650551; doi:10.1128/mbio.01146-19), 2019-07-23

Fig. S5

A

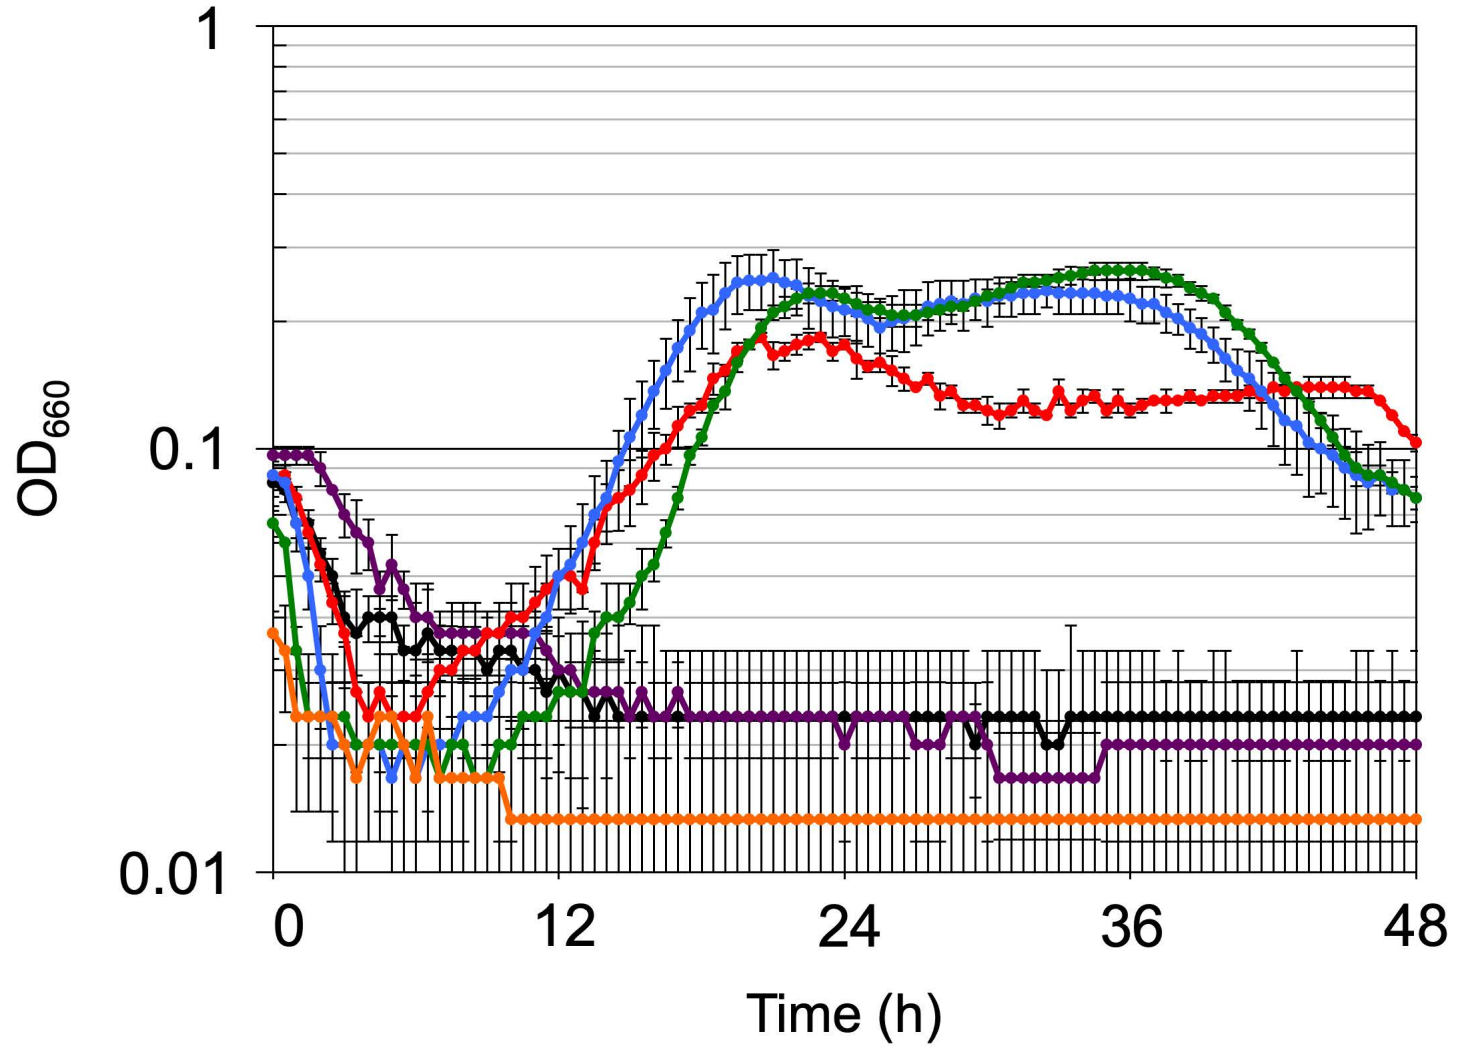

Fig. S5

B

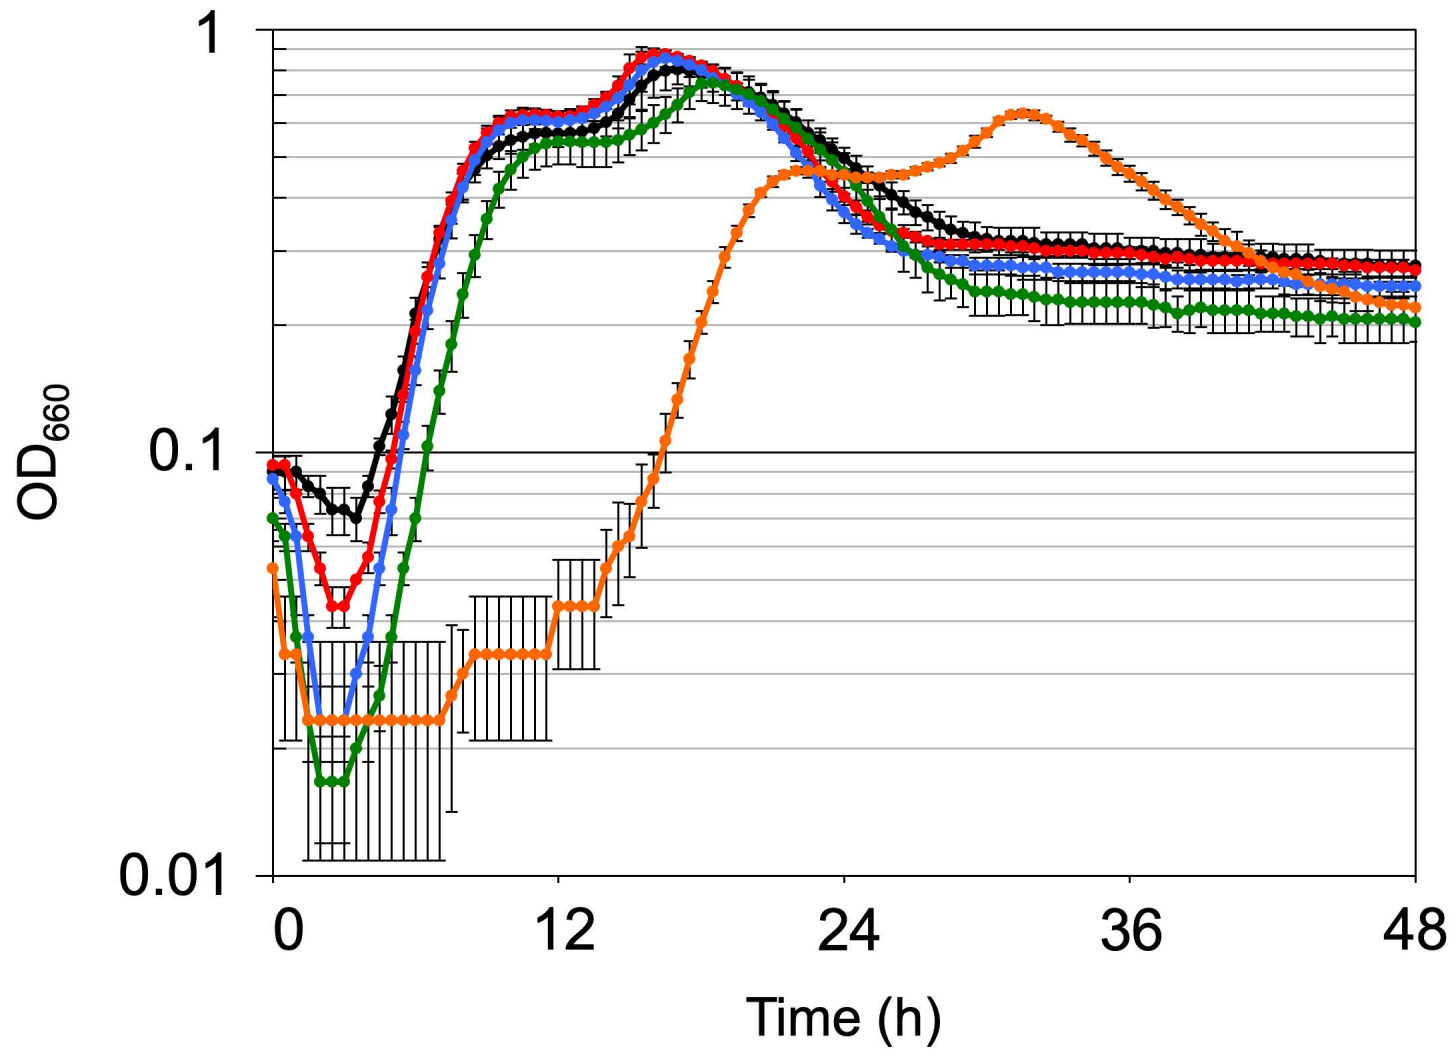

Supplement: mBio.01146-19-sf005.pdf [file mBio.01146-19-sf005.pdf]
