# Supplementary material for: Identification of Dephospho-Coenzyme A (Dephospho-CoA) Kinase in Thermococcus kodakarensis and Elucidation of the Entire CoA Biosynthesis Pathway in Archaea
Source: PubMed Central journal article supplement (PMC6650551; doi:10.1128/mbio.01146-19), 2019-07-23
Supplement: mBio.01146-19-sf006.pdf [file mBio.01146-19-sf006.pdf]

Fig. S6

A

YP\_919986.1 -----MSSSP-----AARRELSYSWYFFDEPPLSVEKAWRLVQS-----SRFGKTE-----ILVGDVVEK 52  
YP\_003816556.1 -----MSGQLRR-----IVEMQDQWVKV-----ICIGDVSVA 26  
YP\_007174639.1 -----MKFVGLTLP-----ENVRYDFSQPRFRVLSG-----REWNFT-----ICVGDVVEY 49  
NP\_147085.1 -----MSVALSIPLLSLP-----EDMREALAAAAPVYSG-----DRFRRLQ-----TPCSGV-----ACTGDVVSQ 54  
YP\_008603597.1 -----MTTKHLLPVLSLP-----EDLRESLASAAPVYSG-----ERFVDEIAA-----TPCGGV-----ACTGDVVSQ 54  
YP\_006363113.1 -----MFLPSPVLR-----EFRRSASLPQCTIYASKGGTVRGLFT-----ATVGDVVE 47  
YP\_001040844.1 -----MKSIFIVPVLPKE-----SYLRKILSTPOCTIYIG-----KYPIKDLEAH-----ILVGDVBSN 49  
YP\_003669616.1 -----MKNKFIIPVLPKE-----SYLRKILCSPOCTIYIG-----KYPIKDLEAH-----ILVGDVBSN 49  
YP\_003650585.1 -----MASAGRSIPCLKPP-----DHLRKALSPOCTIYVVS-----DKQAITGLSCD-----AAVGDVBS 51  
YP\_004177111.1 -----MTRRLPVLPKE-----EHRSLGLIPOCTIYVVSRTRGLVQGLEAD-----VAVGDVBS 49  
YP\_002429036.1 -----MNKAIIPVLPKE-----VDFRLSLSPQCTIYVVSPPDRGLVYGLRAD-----AAVGDVBS 49  
YP\_006402879.1 -----MNKAIIPVLPKE-----VDFRLSLSPQCTIYVVSPPDRGLVYGLRAE-----AAVGDVBS 49  
YP\_004780378.1 -----MHVASPPPGYCLEPS-----EELREYMRRSKYLAYNT-----AELSELSKR-----DRR-----AVTGDYTAR 54  
YP\_005841883.1 -----MN-----DKLKKVLESEFPVYSG-----SSFENLIKTHN-----KFRYITIGDVT 44  
YP\_930015.1 -----MTCFKLC-----CRRDLFAPPYVPIIWKPEPPRSIEVVRDLVES-----YGIEQI-----YTVGDVIT 53  
YP\_001794902.1 -----MRCRLRI-----RERRDLFAPPYVPIIWRDPPRSLEVVSDLALS-----YGVHEH-----YTVGDVVK 53  
YP\_001056647.1 -----MTCYRLA-----KRRDLFAPPYVPIIWRDPPKSEIVRNLVAD-----GGFKH-----YTVGDVTR 53  
YP\_001153914.1 -----MTCYKLS-----RRRDLFAPPYPLTVWRDPPRSVEVVRDFVES-----YDIRH-----YTVGDVTR 53  
YP\_005259057.1 -----MTCYKLS-----RRRDLFAPPYPLTVWRDPPRSVEVVRDFVES-----YDIRH-----YTVGDVTR 53  
NP\_560628.1 -----MEVVKDIAESY-----AER-----YTVGDVTR 25  
YP\_005085004.1 -----MICYRLA-----GRDDLFAFPYVPIIWRDPPSVEFVKNLAES-----YGAVH-----YTVGDVTR 53  
YP\_004337001.1 -----MKVP-----EGRRHLFAFPYVPIIWRDPPRSVELAAEIAAD-----LGAAR-----FTVGDVVA 51  
YP\_004892291.1 -----MRCRLRP-----EERRELFAPPYVPIIWRDPPRSVELALAVAGD-----FGVKI-----YTVGDVVA 54  
YP\_008796927.1 -----MTNLRSPRIVFTEDMKNRVRKPLERHGH-----DLNYSPELAQ-----AKPL-----VVVGDYTR 52  
YP\_003860570.1 -----MLNDLGITKNGTAEFCFLMP-----NELRNLT-----YFHVKCSVYLTRGRDESIGI-----LLRLLYSNVHETMVGDCCK 71  
YP\_008071435.1 -----MRELSTGFEPLVVKL-----EDLKIQLGEC-----CVKQ-----LSVGDVBY 37  
YP\_007687666.1 -----MSAGRLQ-----PSLREEFQKPVGRDIGI-----SELRTIDA-----KL-----IAGDVS 45  
YP\_007713106.1 -----MGMAAGRLR-----PEMREVFQPPVGRDISE-----SELSQIHA-----KHI-----ITVGDV 48  
YP\_001541769.1 -----MSETNHPRLLR-----SKRARALMALPFRSIPRDPDSIMIARELFND-----FKLSI-----ATVGDV 60  
YP\_003902647.1 -----MYVLVS-----KWARSMMAWPLGIIISKEAPDSIIRVSEYGN-----SFI-----ITVGDV 50  
YP\_004244378.1 -----MYVLA-----SKWARSMMAWPLGIIISREAPESIVRSEYSES-----SFI-----ITVGDV 50  
YP\_001737791.1 -----MLFDLKL-----EDKRGKSEIKSIIKSIKSI-----LDLLEN-----KRE-----ISVGDVTR 43  
YP\_023646.1 -----MQLKFDHDLVNL-----QESINRIKEFSSHSCS-----IDDIKKGGR-----I-----ITVGDVTE 48  
YP\_008142358.1 -----MPLKLDNRNIVIG-----SREKRYIQDFKYSKCS-----VDDIRELALK-----NKI-----ISVGDVTE 50  
NP\_111003.1 -----MLLRSGSKYIIT-----AEAREEIKKRNKRVVT-----IDEMVEVSKS-----TQ-----DSVGDV 50  
NP\_394550.1 -----MT-----ESARQKIKGRNRVWDP-----DEVRLDLSVD-----HPV-----AAVGDV 40  
NP\_341954.1 -----MEVRNKNKVNLCFSF-----DNLRNELSRPYGIEFTN-----NKIFLEFISK-----SIQGRSR-----ITVGDV 59  
YP\_005643228.1 -----MEVRNKNKVNLCFSF-----DNLRNELSRPYGIEFTN-----NKIFLEFISK-----SIQGRSR-----ITVGDV 59  
YP\_002915007.1 -----MEIRDNNKVNLCFAF-----DNLRKELSRPYGIEFTN-----NKVFLDFVSK-----SIQGGFKY-----ITVGDV 59  
YP\_002829735.1 -----MEIRDNNKVNLCFAF-----DNLRKELSRPYGIEFTN-----NKVFLDFVSK-----SIQGGFKY-----ITVGDV 59  
YP\_002843724.1 -----MEIRDNNKVNLCFAF-----DNLRKELSRPYGIEFTN-----NKVFLDFVSK-----SIQGGFKY-----ITVGDV 59  
YP\_005648862.1 -----MEIRDNNKVNLCFAF-----DNLRKELSRPYGIEFTN-----NKVFLDFVSK-----SIQGGFKY-----ITVGDV 59  
YP\_005646225.1 -----MEIRDNNKVNLCFAF-----DNLRKELSRPYGIEFTN-----NKVFLDFVSK-----SIQGGFKY-----ITVGDV 59  
YP\_007866027.1 -----MEIRDNNKVNLCFAF-----DNLRKELSRPYGIEFTN-----NKVFLDFVSK-----SIQGGFKY-----ITVGDV 59  
YP\_002832457.1 -----MEIRDNNKVNLCFAF-----DNLRKELSRPYGIEFTN-----NKVFLDFVSK-----SIQGGFKY-----ITVGDV 59  
YP\_002840150.1 -----MEIRDNNKVNLCFAF-----DNLRKELSRPYGIEFTN-----NKVFLDFVSK-----SIQGGFKY-----ITVGDV 59  
YP\_003419971.1 -----MEIRDNNKVNLCFAF-----DNLRKELSRPYGIEFTN-----NKVFLDFVSK-----SIQGGFKY-----ITVGDV 59  
YP\_002837983.1 -----MEIRDNNKVNLCFAF-----DNLRKELSRPYGIEFTN-----NKVFLDFVSK-----SIQGGFKY-----ITVGDV 59  
YP\_004457895.1 -----MEIRDKYKVDLCFYLP-----KEVRKELSRPYGIEFTN-----TEKLLKYVDN-----FERI-----ITVGDV 56  
YP\_001192301.1 -----MEVRYKRVLDLCFRPP-----KTRVAELSRPYGIEFTN-----NAKLLSYLGQ-----FERI-----ITVGDV 56  
YP\_004408663.1 -----MP-----DSIKKELTRPYGIEFTN-----NDIFINFILE-----KKNNR-----ITVGDV 44  
NP\_376249.1 -----MP-----RSLRAELSKPYGIEFTN-----ENKLLKQFLN-----KNSNR-----ITVGDV 44  
YP\_007433930.1 -----MP-----RSLRAELSKPYGIEFTN-----ENKLLKQFLN-----KNSNR-----ITVGDV 44  
YP\_007436201.1 -----MP-----RSLRAELSKPYGIEFTN-----ENKLLKQFLN-----KNSNR-----ITVGDV 44  
YP\_255496.1 -----MP-----RSLRAELSKPYGIEFTN-----ENKLLKQFLN-----KNSNR-----ITVGDV 44  
YP\_008946885.1 -----MEIRNNSIDLCFILP-----RNLRAELSKPYGIEFTN-----ENKLLKQFLN-----MSNSR-----ITVGDV 58  
YP\_001012648.1 -----MPIN-----ENDARLLKQPFIEVDPD-----KQVTKRKVASVLKG-----VKQ-----IAGDVA 48  
YP\_006862428.1 -----MPIL-----MTEILDMSVNKEAVLREAPP-----TIE-----VTGDVTE 34  
YP\_875902.1 -----MKIPLGIIPE-----NQTSKNEIQKYLE-----NSYI-----ITVGDRT 38  
YP\_006776123.1 -----MKIPLGIIPE-----NQTSKNEIQKYLE-----NSYI-----ITVGDRT 38  
YP\_001582567.1 -----MKIPLGIIPE-----NQADKENILKHLE-----NSYI-----ITVGDRT 38  
YP\_006774212.1 -----MKLP-----DSLREQMKIPLGIIPE-----SQSNKENILKHIEQ-----NSYI-----ITVGDRT 48  
ZP\_08257196.1 -----MKLP-----DSLREQMKIPLGIIPE-----SQVNKSNIQKHLK-----NPYI-----ITVGDRT 48  
ZP\_08668423.1 -----MKLT-----EVRAPAKKPPGELVYRGG-----VDVVKRVLKG-----DEF-----VCGDVL 47  
YP\_003400341.1 -----MLRMP-----ESLRKLDLQKPYRVRVYRGRGVELVKRIEELRKA-----KYI-----ACTGDV 49  
NP\_069944.1 -----MKGLRPL-----ESMREELAKPHKRYRGGKELLLVEEISEA-----KPF-----CTGDVVA 51  
YP\_007906114.1 -----MAVKGKLP-----DSLRYLAKPHKRYRGTGKGEDTVEKIEELGKY-----SPLE-----ICVGDV 53  
YP\_001434673.1 -----MTRLLASPRGAVKVD-----DRLLPFLLR-----GKTE-----VTGDVTK 37  
NP\_614736.1 -----MTVVLRPL-----RELREPLRRPWTIYPRPSIKTYRRLHEESEV-----DI-----ITVGDVTR 50  
YP\_003706636.1 -----MNNYIMT-----KELQSILKTPLEKHYKD-----IPEVFKIVKD-----ISISNLI-----ISVGDIT 51  
YP\_001323935.1 -----MYILT-----DKVATELKKPPEKWKYE-----LNSIEG-----KW-----ISVGDIT 39  
YP\_001330653.1 -----MYLLN-----DEVARELKKPPEKWKYE-----LPSIDG-----KW-----VSIGDVT 39  
YP\_001097707.1 -----MYLLN-----DKVAHELKKPPEKWKYE-----LPSIEG-----KW-----VSIGDVT 39  
YP\_004742083.1 -----MYLLN-----DKVAHELKKPPEKWKYE-----LPSIEG-----KW-----VSIGDVT 39  
NP\_987562.1 -----MYLLN-----DKVAHELKKPPEKWKYE-----LPSIEG-----KW-----VSIGDVT 39  
YP\_001548519.1 -----MYLLN-----DKVAHELKKPPEKWKYE-----LPSIEG-----KW-----VSIGDVT 39  
YP\_001324483.1 -----MYMLN-----ESTKEILKKPPEKWKYE-----LPPINR-----KNNIATAGDIT 41  
YP\_004484635.1 -----MYILT-----DELKLLKKPPEKWKYE-----LPPING-----KW-----VSIGDIT 39  
YP\_004575995.1 -----MYLLN-----ERLEILKKPPEKWKYE-----LPLING-----KW-----ISVGDIT 39  
YP\_003616685.1 -----MLKLP-----DHLREELRKPPEKWKYE-----FPDVG-----DI-----VTGDVTK 39  
YP\_003247808.1 -----MLILP-----EELRDLKKPPEKWKYKT-----LPHIDG-----YI-----ITVGDVTK 39  
YP\_003128192.1 -----MLKLP-----EDLRETLKKPPEKWKYKT-----LPNIDG-----DI-----VTGDVTK 39  
NP\_247369.1 -----MLVLP-----EELREKLLKKPPEKWKYKT-----LPDIDG-----DI-----VTGDVTK 39  
YP\_003458341.1 -----MLMLP-----EELREKLLKKPPEKWKYKT-----LPDIDG-----DI-----VTGDVTK 39  
YP\_008075056.1 -----MLQIT-----TKLIQELKDPLELHYPN-----FEDALEDIKA-----SKFL-----ISVGDCTLN 45  
YP\_001272768.1 -----MLRLDAELNKDITISKLLKPLKRYPH-----FEDAIEEIKS-----SEFL-----ISVGDATFN 49  
YP\_003424221.1 -----MFRID-----ENSIDEFKPLVLYPD-----FEDAIPIKE-----ASFL-----ISVGDQTK 45  
YP\_004004002.1 -----MLILP-----KKLRKLLKKPPEKWKYS-----IDDKNFPPN-----EYK-----ISVGDRT 45  
NP\_275409.1 -----MYLLP-----EELRAELKRLPELHRS-----FSDVDV-----GNSFL-----ITVGDVTR 42  
YP\_003849624.1 -----MYLLP-----EELRAELKRLPELHES-----FRDIDV-----GDSFL-----ITVGDVTR 42  
YP\_447663.1 -----MLTLP-----KYLSELKPLKRYYS-----IDIEEKLHQQLSE-----DKLE-----ISVGDAT 49

Fig. S6

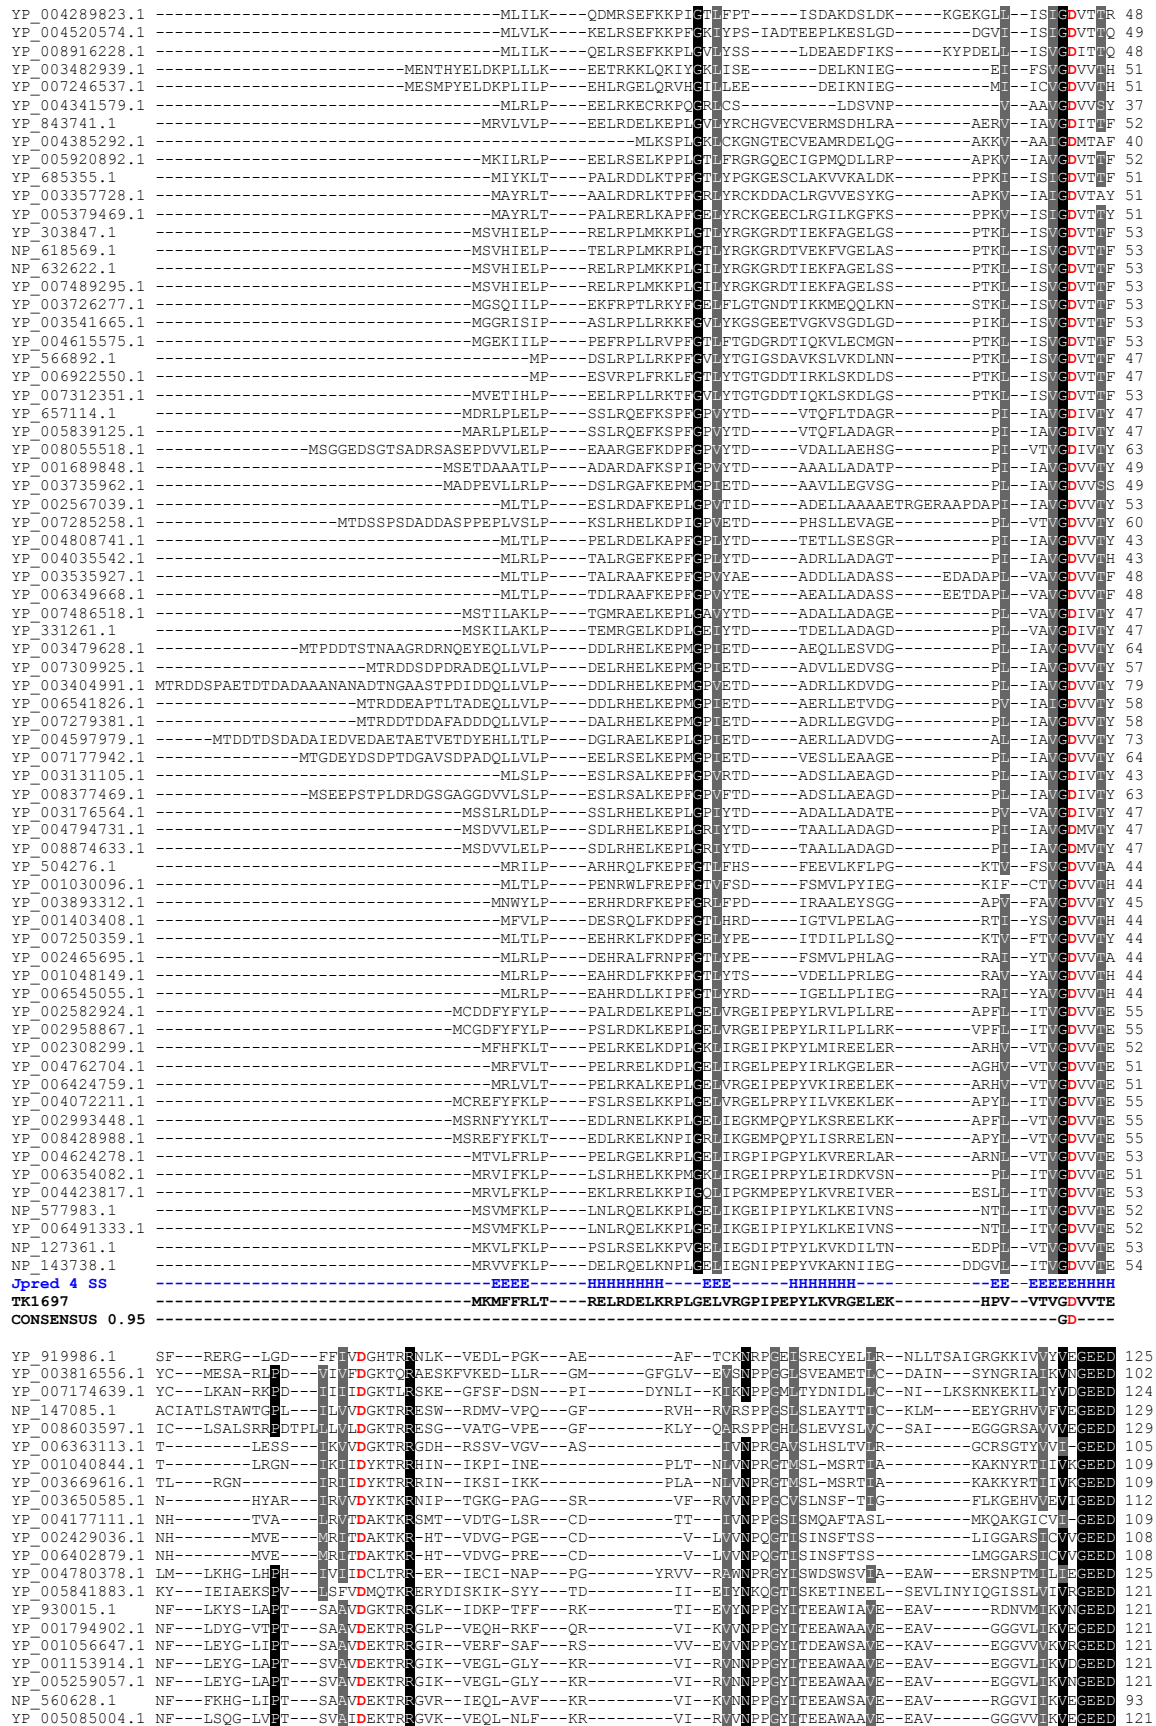

Fig. S6

YF\_004337001.1 NF---LAAG-LAFD---LAVDLKTRSEY---VRTV-EAF---PR-----IL---RVNPPGYTTEEAWAAVE---YA-----VKTPGTLIVDGEED 120  
YF\_004892291.1 NF---LAAG-VVFN---LAVDLKTRREY---VEIT-TRF---PH-----VL---KVNPSPEYTHEAWRAVQ---TA-----VNNDGTLIVDGEED 123  
YF\_008796927.1 RM---IEAG-LRFD---VAVDAKVMNAA---EMPR-LEG---RY-----VT---RVNMAAGVHEPEAAEAAM---SA-----VKKGRGLIVDGEED 144  
YF\_003860570.1 TY---IEFV-GVFR---LAVVDGKTLVYNN---TDIR-DIE---YE-----FNYVE---RCVNPGRCHTTNCEAAK---RCY---KEGVPCRLIVDGEED 121  
YF\_008071435.1 TL---LDNG-FKFD---LAVDLKTRER---RP-FSPL-SSK---LS-----LLCGEEV---VKNPAGYTPELVTEIS---SAL-----GDAPTKRIVDGEED 111  
YF\_007687666.1 TM---REHG-IVPL---LSVVDGYTEREL---TGFADLVR---NT-----GLEET---VVSNPAGTTSQLEDAVE---NAL---AGRSAGIRIVDGEED 119  
YF\_007713106.1 TV---RKHG-IVPL---LSVVDGYTERE---RE-LTGF-ADL---VR---DAGLAET---VVSNPAGTTSQLEDAVE---NAL---AGRSAGIRIVDGEED 122  
YF\_001541769.1 NV---ATYV-RRFD---LAVDLNTRRGTV---IQHS-DMD---GV-----VY---RVNNERSTTSYESFNLR---SAYANV-LSGNRNLIVDGEED 133  
YF\_003902647.1 NT---IRYV-RVFD---LAVDLKTRTIG---MGGV-ETV---GF-----DRVI---NVNPKPATTSIEVINAR---DAMRDA-VNGIHVLTIVDGEED 125  
YF\_004243478.1 NT---IRYV-RVFD---LAVDLKTRTID---MGME-ITG---FD-----KVI---NVNPKPATTSIEVINAR---GAMREA-MGGSRLVLTIVDGEED 124  
YF\_001737391.1 EL---LGSY-RRFE---LAVIDLKEREMN---CSTI-FYL---DD-----YLIL---VVRNPAQTMRMRAWLKR---KAIIS-LSGNAAVIVDGEED 118  
YF\_023646.1 NL---ERAG-LDIF---LAVDLKTRSEK---TYNH-REN---SI-----SIENRPTTSLSLIRAE---SSI---KSNKTRRIVDGEED 116  
YF\_008142358.1 NL---KNAG-IKLN---LAVDLVTRR---DG-KRFM-HEE---GS-----I---TVSNPPGITSIDLNRKY---EFI---STGVHGRIVDGEED 118  
NF\_111003.1 NL---RRAG-AKLF---LAVDLKTRGES---IFQH-EEG---SI-----TVRNDPGTTSFDLIEAK---SSI---ENNKPTRRIVDGEED 118  
NF\_394550.1 NL---RKVN-ARVL---LAVDLKTRSDL---LFAH-EEG---SI-----VIRNDPGTTSFDLIRALQ---SAL---LSDKKTTRIVDGEED 108  
NF\_341954.1 VL---EENG-IVFF---LAVVDGKTKTIT---QNRA-ITR---NK-----EY---KVNPAEKRFEIFEIME---NIL---KDRGGVIVDGEED 129  
YF\_005643228.1 VL---EENG-IVFF---LAVVDGKTKTIT---QNRA-ITR---NK-----EY---KVNPAEKRFEIFEIME---NIL---KDRGGVIVDGEED 129  
YF\_002915007.1 VL---EENG-IVFF---LAVVDGKTKRSIP---QHRA-IVK---NK-----EY---RVNPAEKRFEIFEIME---NIL---KDRGGVIVDGEED 129  
YF\_002829735.1 VL---EENG-IVFF---LAVVDGKTKRSIP---QHRA-IVK---NK-----EY---RVNPAEKRFEIFEIME---NIL---KDRGGVIVDGEED 129  
YF\_002843724.1 VL---EENG-IVFF---LAVVDGKTKRSIP---QHRA-IVK---NK-----EY---RVNPAEKRFEIFEIME---NIL---KDRGGVIVDGEED 129  
YF\_005648862.1 VL---EENG-IVFF---LAVVDGKTKRSIP---QHRA-IVK---NK-----EY---RVNPAEKRFEIFEIME---NIL---KDRGGVIVDGEED 129  
YF\_005646225.1 VL---EENG-IVFF---LAVVDGKTKRSIP---QHRA-IVK---NK-----EY---RVNPAEKRFEIFEIME---NIL---KDRGGVIVDGEED 129  
YF\_007866027.1 VL---EENG-IVFF---LAVVDGKTKRSIP---QHRA-IVK---NK-----EY---RVNPAEKRFEIFEIME---NIL---KDRGGVIVDGEED 129  
YF\_002832457.1 VL---EENG-IVFF---LAVVDGKTKRSIP---QRTI-VKN---KE-----Y---RVNPAEKRFEIFEIME---NIL---KDRGGVIVDGEED 128  
YF\_002840150.1 VL---EENG-IVFF---LAVVDGKTKRSIP---QRTI-VKN---KE-----Y---RVNPAEKRFEIFEIME---NIL---KDRGGVIVDGEED 128  
YF\_003419971.1 VL---EENG-IVFF---LAVVDGKTKRSIP---QRTI-VKN---KE-----Y---RVNPAEKRFEIFEIME---NIL---KDRGGVIVDGEED 128  
YF\_002837983.1 VL---EENG-IVFF---LAVVDGKTKRSIP---QRTI-VKN---KE-----Y---RVNPAEKRFEIFEIME---NIL---KDRGGVIVDGEED 128  
YF\_004457895.1 EL---LKNR-RRVF---LAVVDGKTKRNIK---LHMR-FSN---YI-----YI---MVRNPAQLRSLSAMS YK---AAL---NSFSSVIVDGEED 124  
YF\_001192301.1 LV---TRSG-IRPF---LAVVDGKTKRNVN---ISGERSSE---YI-----YI---MVRNPAQLRSLSAMS YK---EIM---YNSPFRSIVDGEED 123  
YF\_004408663.1 Y-----MTPE---LAVVDGKTKRNT---LDHR-ETE---F-----F---RVNPAQLRSLSAMS YK---SIM---ENRPTTRIVDGEED 61  
NF\_376249.1 TL---YDRN-IRPF---LAVVDGKTKRQIK---VKTV-NEN---VI-----VI---KVNPKSTTRFSVMKIK---NLL---DKNERATIVDGEED 112  
YF\_007433930.1 TI---LKFH-IKPF---LAVVDGKTKRKL---K-EN-FGQ---FE-----YI---KVNPEPLRLSTIREK---DILV---HNENDKILV DGEED 114  
YF\_007436201.1 TI---LKFH-IKPF---LAVVDGKTKR---KL-VKEN-FGQ---FE-----YI---KVNPEPLRLSTIREK---DILV---HNENDKILV DGEED 114  
YF\_255496.1 TI---LKFH-IKPF---LAVVDGKTKR---KL-VKEN-FGQ---FE-----YI---KVNPEPLRLSTIREK---DILV---HNENDKILV DGEED 114  
YF\_008946885.1 TI---LKFH-IRPF---LAVVDGKTKR---KL-VQEN-FGQ---FE-----YL---KVNPEPLRLSTIREK---DI---LV---YHNKDLIVDGEED 128  
YF\_001012648.1 TL---IRHG-VKPF---VAVFDCEARRDK---TCPS-IFE---GY-----AIL---RTRNERSTVEPAGVVR---KAL---RQGHVTVRVDGEED 77  
YF\_006824248.1 RL---VSFG-IKFD---LAVVDGKERESKR---SYSA-SYS---AK-----EL---HCINPACTSKAEAVQVQ---Q---DA---RMPSPVRIVDGEED 118  
YF\_875902.1 RI---SGFG-MTFL---LAVVDGKTRAAH---EPAGPPD---VE-----II---RCENPAAGSPECIETIR---RAL---GSSSPLRIVDGEED 105  
YF\_006766123.1 KM---IDFD-LIFS---LAVVDGQEKREK---IPPK-LKN---AI-----EL---TVDNPPAETSQSISVVK---KAF---TKMSPVRLIVDGEED 108  
YF\_001582567.1 KM---IDFD-LIFS---LAVVDGIEKREK---EPPK-LVN---AT-----EI---TVDNPPAETSQSISVVK---KAF---TKMSPVRLIVDGEED 108  
YF\_006774212.1 KM---IGFD-LIFS---LAVVDGIEKREK---EPPK-LAN---AT-----EI---TVDNPPAETSQSISVVK---KAF---SMKSPVRLIVDGEED 118  
ZF\_08257196.1 KM---VDFG-FIFS---LAVVDNQEKRVKR---EPTKNIHG---YT-----EL---VCENPAEETPQSVEIK---KAF---ESKPPVRLIVDGEED 119  
ZF\_08668423.1 KM---ISFG-FIFS---LAVVDNYEKR---VK-REPT-MSP---TV-----YTEL---TCNPPAETPASIDIK---KAF---LEKTPVRLIVDGEED 105  
YF\_003400341.1 TT---LKAG-FPKP---LAVVDGKSIREL---NSVV-----NIRDLRSRKYKEI---VVENPAQOTEDLAEKVF---EAVNSA-LBGNVRLIVDGEED 126  
YF\_003436628.1 YS---LQAG-YKFD---LAVVDKYTEREKL---DDDFSSKI---SK---LLEGEYKV---EENPQSCSEDLVQV---EAVRN---LGRRRATIVDGEED 128  
NF\_069944.1 SA---IKVG-LTFD---LAVVDGKTLREEN---VEFQEAFF---DE-----VI---ETINPPAHSCELLISAL---KALKLC-EDGRKVLIVDGEED 125  
YF\_007906114.1 YI---FKAG-YNFD---LAVVDFKTIRNEI---DEEV-ISFIESKT---EGYVRL---DWNPPQYITDLVLEK---I---EAVS---LLPKKVLIVDGEED 131  
YF\_001434673.1 RC---LELG-LVFR---LAVVDGKTRSQW---VELR-APN---GV-----L---KAFNPPQCLDAKAVVK---KAILTS---TWKVKVEED 104  
NF\_614736.1 SF---LRCS-IRFD---LAVVDKRMILTVP---VDFG-NKF---PV-----TL---DWNPPPTTREAMDTR---RGIDYA-LDGDATLIVDGEED 123  
YF\_003706636.1 NL---IEYG-IFPK---LAVLDFKTKRDIIP---VDIS-YNF---KK-----VY---TVNPPAETSQTSMEIK---KAF---YLSDIDDREVALIVDGEED 122  
YF\_001323935.1 HL---LSNG-IVFD---LAVLDFKTKRNVF---VEIP-HKF---KT-----VF---EVENPPGCSDEAIERK---KAF---YLSDIDRDMALIVDGEED 110  
YF\_00130653.1 HL---LSNG-IVFD---LAVLDFKTKRNVF---VEIP-HKF---KT-----VF---EVENPPGCSDEAIERK---KAF---YLSDIDRDMALIVDGEED 110  
YF\_001097707.1 HL---LSNG-IVFD---LAVLDFKTKRNVF---VEIP-HKF---KT-----VF---EVENPPGCSDEAIERK---KAF---YLSDIDRDMALIVDGEED 110  
YF\_004742083.1 HL---LSNG-IVFD---LAVLDFKTKRNVF---VEIP-HKF---KT-----VF---EVENPPGCSDEAIERK---KAF---YLSDIDRDMALIVDGEED 110  
NF\_987562.1 HL---LSNG-IVFD---LAVLDFKTKRNVF---VEIP-HKF---KT-----VF---EVENPPGCSDEAIERK---KAF---YLSDIDRDMALIVDGEED 110  
YF\_001548519.1 HL---LSNG-IVFD---LAVLDFKTKRNVF---VEIP-HKF---KT-----VF---EVENPPGCSDEAIERK---KAF---YLSDIDRDMALIVDGEED 110  
YF\_001324483.1 NL---LSKS-IVFN---LAVLDFKTKRNVF---VEIP-HKF---KT-----VF---EVENPPGCSDEAIERK---KAF---YLSDIDRDMALIVDGEED 113  
YF\_004484635.1 TL---LQSG-IVFN---LAVLDFKTKRDIK---VDIE-HKF---KK-----TF---EVENPPGCSDEAIERK---KAF---YLANINDKIALIVDGEED 110  
YF\_004575995.1 NL---LSKN-IVFN---LAVLDFKTKRDIS---VEIN-HKF---KK-----VF---EVENPPGCSDEAIERK---KAF---YLSRNNDDVALIVDGEED 110  
YF\_003616685.1 SA---IEKG-VKIK---LAVLDFKTKRNVF---VEIP-HKF---KT-----TF---EVENPPGCSDEAIERK---KAF---YISQLNDDVALIVDGEED 110  
YF\_003247808.1 TV---IENG-IVFK---LAVLDFKTKRNVF---VEIP-HKF---KT-----VI---KVNPAQCSNPAESIK---KAF---YLSDINDKIALIVDGEED 110  
YF\_003128192.1 TV---IENN-IVFK---LAVLDFKTKRNVF---VEIP-HKF---KT-----II---KVNPAQCSDEAIESK---KAF---YLSDINDKIALIVDGEED 110  
NF\_247369.1 TA---IENN-IVFK---LAVLDFKTKRNVF---VEIP-HKF---KT-----VI---KVNPAQCSDEAIESK---KAF---YLSDINDKIALIVDGEED 110  
YF\_003458341.1 TV---IENN-IVFK---LAVLDFKTKRNVF---VEIP-HKF---KT-----II---KVNPAQCSDEAIESK---KAF---YLSDINDKIALIVDGEED 110  
YF\_008075056.1 NL---ISHN-IVFD---VAVLDNRIQRKDH---DSII-NYT---DN-----IL---TAVNPAQTDDLWETG---FAIKQSIENNTRYIVDGEED 119  
YF\_001272768.1 NL---TKYE-LVFD---LAVLDNRIQRKDH---NHEV-IRA---EN-----IL---KAVNPAQTDDLWETG---QAMKLS-GDGNCHIVDGEED 122  
YF\_003424221.1 NL---LDND-LVFN---LAVLDNRIQRKDH---NHDI-IRT---EN-----IL---KAVNPAQTDDLWETG---LAISSLEDDTRIVDGEED 119  
YF\_004004002.1 NL---VDRG-LVFD---VAVLDNRIOQRKKS---YTRI-EYK---SK-----IL---NVSNPPGTTESLMAK---KAL---KSKEKTIIVDGEED 115  
NF\_275409.1 NA---LEHG-LKFD---VAVLDNRIOQRKKS---DHEF-RTT---AT-----IL---RSRNPPTTETSLWKSIE---EAIEGATERGERFIVDGEED 116  
YF\_003849624.1 NA---LEHG-LKFD---VAVLDNRIOQRKKS---DHEF-RTT---AT-----II---RSTNPPPTTETSLWKSIE---KALDGA-RAGERFIVDGEED 115  
YF\_447663.1 NL---IKLN-IFQF---LAVLDNKIEREPV---EHLK-THT---DN-----LV---HVNPAQOTDELVKICI---DSINTA-TSNPFVIVDGEED 122  
YF\_004289823.1 KM---LDEG-IVFD---VAVLDNKIEREPS---DYEI-CYD---NV-----TL---KTRNPPPTTQDMKTK---EGFSLVEKAGYVIVDGEED 122  
YF\_004520574.1 NM---LDAD-IVFD---VAVLDNKIEREPS---ENEI-YVD---NI-----TL---KTRNPAQTDELQNTG---KSNFLIENEGYVIVDGEED 123  
YF\_008916228.1 NL---QKAD-LIPH---LAVLDNVVERKPA---AYDV-VYD---NV-----TL---NVRNPPGVTDELQETHK---RAFQLV-KSGFVRLIVDGEED 121  
YF\_003482939.1 TL---LNRG-IVPK---LAVVDYKTRGSK---IYEDVKVF---GK-----KII---KVNPRSQTPPELVNAR---EA---MQYDSVKIVDGEED 122  
YF\_007246537.1 TL---LKMG-IVPK---LAVVDYKTRGSK---VFDV-VRS---FG-----ERVF---RVNPAQTTPGLWDAVK---KAL---ISEKNVIVDGEED 123  
YF\_004341579.1 SL---LSMG-RKVF---LAVVDGRTER---RK-FEQL-EEL---ER---MTAEYERI---EVENPPPTTYELVDAK---RAVEVA-AGVPTKIVDGEED 115  
YF\_843741.1 YL---LKAS-FIFD---LAVVDHKTRESVP---EDSI-KRRHLEGS---YRNV---NVNPAQTTEELLDAR---ESL---NGCPTTRIVDGEED 127  
YF\_004385292.1 YL---LKSS-IVFD---LAVVDNKTR---AQ-LPDH-ILQ---SL---EHNSYKRV---EVENPPAQTTEELLDAR---DSL---ACKERVIVDGEED 115  
YF\_005920892.1 CL---LSSSGRKF---LAVVDHKTRESVP---VPDH-VQQ---GI---GDRDEYDI---EVENPPAQTTEELLDAR---ERL---AGNVRKIVDGEED 129  
YF\_685355.1 YL---LKAG-VVFD---MCLVDQTMK---LP-VDHE-VRK---GT---SHHTFKEL---RVNPAQVTOALMDLK---DNM---SSTEPVRLIVDGEED 126  
YF\_003357728.1 HL---LKAG-IVFD---MCLVDQTMK---LP-VAHE-VRK---GT---AHESFVDI---VKNPAQVTOELIDAK---NNM---ASRPVRLIVDGEED 126  
YF\_005379469.1 FL---LKSQ-RVFD---MCLVDLTMK---LP-VDIE-VKQ---GT---AHESFMDV---RVNPAQVTOELIGAR---DNM---YSERPVRIVDGEED 126  
YF\_303847.1 HL---LEVG-IVFD---LAVVDNRTRK---KP-VSSD-VSA---RN---MDKVYEEV---SVDNPAQTDELKTC---EAF---ASEKPLRIVDGEED 128  
NF\_618569.1 HL---LEAG-IVFD---LAVVDNRTRK---KP-VSRD-VSD---RN---RDKVYEEV---SVDNPAQTDELKTC---EAF---ASEKPLRIVDGEED 128  
NF\_632622.1 HL---LEAG-IVFD---LAVVDNRTRK---KP-VSSD-VSV---RN---RDKVYEEV---SVDNPAQTDELKTC---EAF---ASEKPLRIVDGEED 128  
YF\_007489295.1 HL---LEAG-IVFD---LAVVDNRTRK---KP-VSSD-VSV---RN---RDKVYEEV---SVDNPAQTDELKTC---EAF---ASEKPLRIVDGEED 128  
YF\_003726277.1 YL---IESG-IVFD---VAVLDNRTNRKPT---PDRV-DKN---HR-----FTQV---TVNPPSPTTDELVNNIE---NAF---LSDKNRIVDGEED 125  
YF\_003541665.1 HL---LKSJ-IVFD---LAVVDNRTRK---QPA-CEQM-ITG---TK---QSGFKEL---VKNPAQVTEELVDFAFA---EAL---DSNRNRLIVDGEED 128  
YF\_004615575.1 HL---LSDS-IVFD---LAVVDNRTRK---EPA-SEKV-VSG---TR---HTGFKEI---TVNPAQTTEELVNVN---YAF---SDSNRIVDGEED 128  
YF\_566892.1 HL---LSDS-IVFD---LAVVDNRTRK---EPA-SSQV-VFG---TK---HKGFAEI---TVNPPSPTTDELVNVN---DAI---VSDKNRIVDGEED 122  
YF\_006922550.1 HL---LSDS-IVFD---LAVVDNRTRK---EPA-SDRV-VVG---TK---HKGFAEI---TVNPPSPTTDELVNVN---DAI---VSDKNRIVDGEED 122  
YF\_007312351.1 HL---LNSN-IVFD---LAVVDNRTRK---EPA-SAHV-VVG---TK---HTGFSEI---FVNNPPSPTTDELVNVN---DAI---ISKDHVRLIVDGEED 128  
YF\_657114.1 HL---QTVY-YTFA---VAVVDGQTKR---ES-VDET-VKA---AL---SKHNRI---DVENPQTSIALLEAQ---TAV---DETPESVMLIVDGEED 121  
YF\_005839125.1 HL---QTVY-YTFA---VAVVDGQTKRESV---DETVKPAKSHKN---RI---DVENPQTSIALLEAQ---TAV---DETPESVMLIVDGEED 121

Fig. S6

|                |     |               |               |         |                  |           |            |              |            |          |               |             |              |             |         |      |      |      |     |      |     |
|----------------|-----|---------------|---------------|---------|------------------|-----------|------------|--------------|------------|----------|---------------|-------------|--------------|-------------|---------|------|------|------|-----|------|-----|
| YF_008055518.1 | HF  | ---EQAD-HQEA  | ---VAFVDGRTK  | ETA     | ---PDDVRAELDERPN | -----RI   | ---TVGNPA  | GVITADLLGA   | IA         | ---DAL   | ----DIDGPTT   | IVVDGEED    | 137          |             |         |      |      |      |     |      |     |
| YF_001689848.1 | HL  | ---VDAG-QTFA  | ---VAVVDGRTK  | DA      | ---VRPA-VRD      | ---AI     | ---PEPDL   | ---TWASEP    | TVSVSLVRA  | IV       | ---DAI        | ----ADADAT  | VVVDGEED     | 121         |         |      |      |      |     |      |     |
| YF_003735962.1 | HF  | ---ERIG-RTPD  | ---VAVVDGLTER | ETV     | ---DVEP-AAALEGSD | -----ARRI | ---AATNPA  | CAISERICRA   | IR         | ---EAI   | ----ESDEPVA   | IVVDGEED    | 124          |             |         |      |      |      |     |      |     |
| YF_002567039.1 | HL  | ---REAG-RVFD  | ---VAVVDGKTER | ET      | ---VDAA-IGS      | ---AL     | ---AAADRR  | ---SVEENPAAS | SAAELLEAS  | ---EAL   | ----SDADPVI   | IVVDGEED    | 128          |             |         |      |      |      |     |      |     |
| YF_007285258.1 | HV  | ---LEAG-RTPD  | ---VAVVDGRTK  | EA      | ---VDVA-IRE      | ---TV     | ---TAGETV  | ---DVENPQ    | SAITDALIRA | IV       | ---AAI        | ----DDPPPTV | IVVDGEED     | 133         |         |      |      |      |     |      |     |
| YF_004808741.1 | HL  | ---RMAG-HEPH  | ---VAVVDGRTK  | ER      | ---VTDE-IRD      | ---AV     | ---DAAGRRV | ---EHRNEP    | AEISRDLV   | IA       | ---DAI        | ----DHEESS  | IVVDGEED     | 118         |         |      |      |      |     |      |     |
| YF_004035542.1 | HL  | ---RRAG-RTPD  | ---VAVVDGKTER | EA      | ---VDEE-IRR      | ---AL     | ---SDPETRR | DVNPPAGE     | TEALADTR   | ---DAL   | ----DADDPVI   | VVVDGEED    | 117          |             |         |      |      |      |     |      |     |
| YF_003535927.1 | HL  | ---RRAG-RFPD  | ---VAVVDGKTER | EA      | ---VGEE-IRR      | ---AV     | ---ETGRLV  | ---EVENP     | ETVSVALVEA | IV       | ---AAL        | ----DDPPTT  | IVVDGEED     | 121         |         |      |      |      |     |      |     |
| YF_006349668.1 | HL  | ---RRAG-RFPD  | ---VAVVDGKTER | EA      | ---VDEE-IRR      | ---AI     | ---ETGRLV  | ---EVENP     | ETVSPDLVSA | IV       | ---EAL        | ----DAEPTT  | IVVDGEED     | 121         |         |      |      |      |     |      |     |
| YF_007485618.1 | HL  | ---LEAG-RFPD  | ---VAVVDGKTER | ER      | ---VERE-VLG      | ---AI     | ---EAFDRI  | ---DVANP     | OSTTDDLL   | EA       | ---SAL        | ----EAPGST  | VVVDGEED     | 121         |         |      |      |      |     |      |     |
| YF_331261.1    | HL  | ---LEAG-HRPA  | ---VAVVDGKTER | ERV     | ---ERKV-LSA      | ---TE     | ---EFDERI  | ---DVANP     | OSTTDDLL   | EA       | ---SAL        | ----DRPPTV  | VVVDGEED     | 121         |         |      |      |      |     |      |     |
| YF_003479628.1 | HL  | ---LQAG-RVFD  | ---VAVVDERTK  | DA      | ---VDEE-IRD      | ---TV     | ---ATEPTH  | ---EAINPP    | AEISGDVIRA | IR       | ---EGL        | ----DDEPAT  | VVVDGEED     | 137         |         |      |      |      |     |      |     |
| YF_007309925.1 | HI  | ---VRAG-RDPD  | ---VAVVDERTK  | QL      | ---VEAE-IRE      | ---TV     | ---TERVNE  | EARNPPAE     | TSVDLETR   | ---ESL   | ----EREPTT    | VVVDGEED    | 130          |             |         |      |      |      |     |      |     |
| YF_003404991.1 | HF  | ---LRAG-RFPD  | ---VAVVDERTK  | SA      | ---VDEE-IRE      | ---TV     | ---TEGTTV  | ---EAVNPP    | AEISQAVVEA | IV       | ---EGL        | ----ASDEPT  | IVVDGEED     | 152         |         |      |      |      |     |      |     |
| YF_006541826.1 | HL  | ---LQAG-HRPA  | ---VAVVDGRTK  | TA      | ---VDEE-IRD      | ---AV     | ---TEGASI  | ---EAVNPP    | AEISGAPVVA | IR       | ---RAL        | ----AADPPT  | IVVDGEED     | 131         |         |      |      |      |     |      |     |
| YF_004729381.1 | HL  | ---LQAG-RFPD  | ---VAVVDGRTK  | TE      | ---VDAA-IRE      | ---AV     | ---TEGASI  | ---EAVNPP    | AEISGVPVVA | IR       | ---RAL        | ----DADDPVI | VVVDGEED     | 131         |         |      |      |      |     |      |     |
| YF_004597979.1 | HL  | ---LEAG-RAPD  | ---VAVVDERTK  | EA      | ---VNEE-VRE      | ---TI     | ---TAEPTH  | ---EAVNPP    | AEISADVIEA | IV       | ---EAL        | ----EREPTT  | IVVDGEED     | 146         |         |      |      |      |     |      |     |
| YF_007177942.1 | HL  | ---LEAG-HEPD  | ---VAVVDERTK  | EA      | ---VDEE-IRE      | ---TV     | ---TARTNL  | ---EAVNPP    | AEISTEDVVA | IC       | ---EGL        | ----SRLEPT  | VVVDGEED     | 137         |         |      |      |      |     |      |     |
| YF_003131105.1 | HL  | ---LEAG-RFPD  | ---VAVVDERTK  | SA      | ---VDAG-IRE      | ---RIVEDE | GWGEFYRV   | ---QVDNPA    | GTAAALGA   | IV       | ---EA         | ---LD-RDEP  | STIVVDGEED   | 122         |         |      |      |      |     |      |     |
| YF_008377469.1 | HL  | ---LEAG-RFPD  | ---VAVVDERTK  | CA      | ---VEAG-VRDR     | IVGTDAE   | EEWFYRV    | ---QVDNPA    | GTADLLA    | IA       | ---EA         | ---LD-REDE  | STIVVDGEED   | 145         |         |      |      |      |     |      |     |
| YF_001376564.1 | HL  | ---LEAG-YTFA  | ---VAVVDRTK   | AA      | ---VDPE-VRD      | ---AV     | ---GGFDHC  | ---TVGNPA    | GTITGLPL   | IG       | ---RGL        | ----GEDGTT  | IVVDGEED     | 121         |         |      |      |      |     |      |     |
| YF_004794731.1 | HL  | ---LEAG-RVFD  | ---VAVVDERTK  | SA      | ---VDAD-VSA      | ---AI     | ---DGFDRK  | ---DVSNPA    | GTAEALLA   | IA       | ---DGI        | ----DSGETT  | IVVDGEED     | 121         |         |      |      |      |     |      |     |
| YF_008874633.1 | HL  | ---LEAG-RVFD  | ---VAVVDERTK  | SA      | ---VDAD-VSA      | ---AI     | ---DGFDRK  | ---DVSNPA    | GTAEALLA   | IA       | ---DGI        | ----DSGETT  | IVVDGEED     | 121         |         |      |      |      |     |      |     |
| YF_504276.1    | NL  | ---LRAG-RFPD  | ---VAVVDGHTM  | QPY     | ---PGVN-IPE      | ---YH     | ---QL      | ---LVKNPA    | SGTDEL     | LDATQ    | ---IA         | ---ASRG     | TVVVDGEED    | 113         |         |      |      |      |     |      |     |
| YF_001030096.1 | NA  | ---LSAG-LIFP  | ---VAVVDGRTK  | SPY     | ---LKMPE-IQ      | ---GH     | -----IL    | ---HTVNP     | AGTITDEL   | IAA      | ---TA         | ---LMD      | EPVTVVVDGEED | 113         |         |      |      |      |     |      |     |
| YF_003893312.1 | NL  | ---VRND-VVPE  | ---VAVVDGRTM  | EP      | ---SRTPLRS       | ---SR     | -----F     | ---EVENP     | AGTITGEL   | LDITL    | ---LA         | ---LES      | FPALVVDGEED  | 114         |         |      |      |      |     |      |     |
| YF_001403408.1 | SL  | ---QQAG-ITFA  | ---VAVVDGRTM  | SPC     | ---IKMP-EIA      | ---GP     | -----CI    | ---HVKNP     | PGTITDEL   | VSA      | ---HA         | ---VDHT     | PTVIVVDGEED  | 113         |         |      |      |      |     |      |     |
| YF_007250359.1 | TL  | ---KQNG-ILPA  | ---VAVVDGRTM  | SPC     | ---NRAPEV        | ---PG     | -----E     | ---SL        | ---RVKNPA  | GTITDEL  | VAA           | ---YA       | ---VHEP      | PLIVVDGEED  | 113     |      |      |      |     |      |     |
| YF_002465695.1 | NI  | ---LAAQ-ILPA  | ---VAVVDGRTM  | SPC     | ---PPAL-LHQ      | ---AR     | -----QI    | ---LVKNPA    | GTITDEL    | VAA      | ---DA         | ---AAN      | PPALIVVDGEED | 113         |         |      |      |      |     |      |     |
| YF_001048149.1 | NL  | ---LAAQ-VVFD  | ---VAVVDGRTM  | TPC     | ---NRSP-LLR      | ---AR     | -----RL    | ---TVKNPP    | GTITGEL    | TD       | ---EA         | ---VKG      | PPVIVVDGEED  | 113         |         |      |      |      |     |      |     |
| YF_006545055.1 | NL  | ---LRAG-IVFD  | ---VAVVDGRTM  | TPC     | ---TRSP-LIQ      | ---AR     | -----RI    | ---TVKNPP    | GTITDEL    | VDA      | ---EV         | ---IRG      | PPVIVVDGEED  | 113         |         |      |      |      |     |      |     |
| YF_002582924.1 | NV  | ---IRLG-VVFS  | ---VAVVDHRTK  | KAY     | ---NPSV-GSE      | ---AV     | -----FL    | ---TVKNPP    | GTITKALL   | NVA      | ---IR         | ---KG       | VEIARGR      | VVIVVDGEED  | 128     |      |      |      |     |      |     |
| YF_002958867.1 | NV  | ---IRLG-MHFS  | ---VAVVDHRTK  | KAY     | ---NPSV-GSE      | ---AV     | -----FL    | ---TVKNPP    | GTITKALL   | NVA      | ---IR         | ---KG       | VEIARGR      | VVIVVDGEED  | 128     |      |      |      |     |      |     |
| YF_002308299.1 | NV  | ---LRLG-IRFS  | ---VAVVDHRTK  | KAY     | ---NPSV-GSE      | ---AV     | -----FL    | ---TVKNPP    | GTITKALL   | NVA      | ---IR         | ---KG       | VEIARGR      | VVIVVDGEED  | 128     |      |      |      |     |      |     |
| YF_004762704.1 | NV  | ---LRLG-IRFS  | ---VAVVDHRTK  | KAY     | ---NPSV-GSE      | ---AV     | -----FL    | ---TVKNPP    | GTITKALL   | NVA      | ---IR         | ---KG       | VEIARGR      | VVIVVDGEED  | 128     |      |      |      |     |      |     |
| YF_006424759.1 | NV  | ---LRLG-IRFS  | ---VAVVDHRTK  | KAY     | ---NPSV-GSE      | ---AV     | -----FL    | ---TVKNPP    | GTITKALL   | NVA      | ---IR         | ---KG       | VEIARGR      | VVIVVDGEED  | 128     |      |      |      |     |      |     |
| YF_004072211.1 | NV  | ---LRLG-IRFS  | ---VAVVDHRTK  | KAY     | ---NPSV-GSE      | ---AV     | -----FL    | ---TVKNPP    | GTITKALL   | NVA      | ---IR         | ---KG       | VEIARGR      | VVIVVDGEED  | 128     |      |      |      |     |      |     |
| YF_002993448.1 | NV  | ---LRLG-IRFS  | ---VAVVDHRTK  | KAY     | ---NPSV-GSE      | ---AV     | -----FL    | ---TVKNPP    | GTITKALL   | NVA      | ---IR         | ---KG       | VEIARGR      | VVIVVDGEED  | 128     |      |      |      |     |      |     |
| YF_004828988.1 | NV  | ---LRLG-IRFS  | ---VAVVDHRTK  | KAY     | ---NPSV-GSE      | ---AV     | -----FL    | ---TVKNPP    | GTITKALL   | NVA      | ---IR         | ---KG       | VEIARGR      | VVIVVDGEED  | 128     |      |      |      |     |      |     |
| YF_004624278.1 | NV  | ---LRLG-IRFS  | ---VAVVDHRTK  | KAY     | ---NPSV-GSE      | ---AV     | -----FL    | ---TVKNPP    | GTITKALL   | NVA      | ---IR         | ---KG       | VEIARGR      | VVIVVDGEED  | 128     |      |      |      |     |      |     |
| YF_006354082.1 | NI  | ---LRLG-LNPN  | ---VAVVDHRTK  | KAY     | ---NPSV-GSE      | ---AV     | -----FL    | ---TVKNPP    | GTITKALL   | NVA      | ---IR         | ---KG       | VEIARGR      | VVIVVDGEED  | 128     |      |      |      |     |      |     |
| YF_004423817.1 | NV  | ---LRLG-LNPN  | ---VAVVDHRTK  | KAY     | ---NPSV-GSE      | ---AV     | -----FL    | ---TVKNPP    | GTITKALL   | NVA      | ---IR         | ---KG       | VEIARGR      | VVIVVDGEED  | 128     |      |      |      |     |      |     |
| NP_577983.1    | NS  | ---LRLG-LRPR  | ---VAVVDHRTK  | KAY     | ---NPSV-GSE      | ---AV     | -----FL    | ---TVKNPP    | GTITKALL   | NVA      | ---IR         | ---KG       | VEIARGR      | VVIVVDGEED  | 128     |      |      |      |     |      |     |
| YF_006491333.1 | NS  | ---LRLG-LRPR  | ---VAVVDHRTK  | KAY     | ---NPSV-GSE      | ---AV     | -----FL    | ---TVKNPP    | GTITKALL   | NVA      | ---IR         | ---KG       | VEIARGR      | VVIVVDGEED  | 128     |      |      |      |     |      |     |
| NP_127361.1    | NI  | ---MRKV-LNPN  | ---VAVVDHRTK  | KAY     | ---NPSV-GSE      | ---AV     | -----FL    | ---TVKNPP    | GTITKALL   | NVA      | ---IR         | ---KG       | VEIARGR      | VVIVVDGEED  | 127     |      |      |      |     |      |     |
| NP_143738.1    | NI  | ---MRKV-LNPN  | ---VAVVDHRTK  | KAY     | ---NPSV-GSE      | ---AV     | -----FL    | ---TVKNPP    | GTITKALL   | NVA      | ---IR         | ---KG       | VEIARGR      | VVIVVDGEED  | 127     |      |      |      |     |      |     |
| Jpred 4 SS     | HH  | ---HH         | ---E          | ---EEEE | ---E             | -----E    | -----E     | ---EE        | ---EE      | ---E     | -----HHHHHHHH | ---HHHHHH   | ---EEEE      | ---         |         |      |      |      |     |      |     |
| TK1697         | NV  | ---LKIG-VKPI  | ---IALVDL     | TKRKEY  | ---SPEI-EDT      | ---AV     | -----FL    | ---TVTNP     | PGTITKALL  | DTV      | ---R          | ---KAFGLA   | ---ERGR      | NVHIVVDGEED | ---     |      |      |      |     |      |     |
| CONSENSUS 0.95 | --- | ---           | ---D          | ---     | ---R             | ---       | ---        | ---          | ---        | ---      | ---N          | ---         | ---          | ---V        | ---GEED |      |      |      |     |      |     |
| YF_919986.1    | L   | LSVALLYCPLNDS | WVIYGNFR      | GYHEV   | IPCTSF           | FRSVAEN   | L          | VKHFEK       |            |          |               |             |              |             | 175     |      |      |      |     |      |     |
| YF_003816556.1 | M   | TAALSCAPANSL  | IYGFEN        | RCAAVV  | VNTN             | IISHEV    | QTRL       | LRVPS        | SSIMVQA    |          |               |             |              |             | 156     |      |      |      |     |      |     |
| YF_007174639.1 | L   | APTLSCAQDNL   | VYGFEN        | KCAALV  | VNNY             | IRREL     | QNKI       | LVLK         | PGIETK     |          |               |             |              |             | 177     |      |      |      |     |      |     |
| NP_147085.1    | L   | AAALDCGIDWT   | VYGFEG        | VGVV    | HRCLR            | KPGLN     | SSLL       | AKFG         | PGVHHQSSP  |          |               |             |              |             | 185     |      |      |      |     |      |     |
| YF_008603597.1 | L   | AAALDCGSGWT   | VYGFEG        | VGVV    | HMNCLR           | KPFGV     | SSGII      | AKFG         | PVVRLLKA   |          |               |             |              |             | 182     |      |      |      |     |      |     |
| YF_006363113.1 | L   | TTSLAWVLSQGT  | VAYGEP        | VGVV    | SVEDK            | VRLAK     | FKIKL      | KPAI         | IHTP       | GRA      |               |             |              |             | 158     |      |      |      |     |      |     |
| YF_001040844.1 | L   | TAYALENEETS   | IAYGEP        | IGVVI   | ---              | KNR       | LKALREL    | KT           | FKPD       | IVVYK    |               |             |              |             | 160     |      |      |      |     |      |     |
| YF_003669616.1 | L   | TAYALENEETS   | IAYGEP        | IGVVI   | ---              | KNR       | FKALREL    | KT           | FKPD       | IVVYK    |               |             |              |             | 160     |      |      |      |     |      |     |
| YF_003650585.1 | L   | FPALPSTGVSS   | IYGFEN        | VGVV    | EL               | ---       | DARG       | IRLKL        | KT         | FKPVNGFI |               |             |              |             | 161     |      |      |      |     |      |     |
| YF_004177111.1 | L   | VPFTL         | TWGS          | VYGF    | EP               | TGVK      | TASR       | RALK         | ILKEL      | KPHMA    | INL           | KG          | QRNG         |             | 163     |      |      |      |     |      |     |
| YF_002429036.1 | L   | VPFTLVRFK     | VYGF          | EP      | VGVV             | ---       | ISSP       | SREVLK       | EL         | KG       | LKPD          | IVIMNL      |              |             | 157     |      |      |      |     |      |     |
| YF_006402879.1 | L   | VPFTLVRFK     | VYGF          | EP      | VGVV             | ---       | ISSP       | SREVLK       | EL         | KG       | LKPD          | IVIMNL      |              |             | 157     |      |      |      |     |      |     |
| YF_004780378.1 | L   | FAPIEAPDGA    | IYGFEN        | SLNV    | VEA              | DWARA     | VALHV      | V            | NMSL       | VKCR     |               |             |              |             | 175     |      |      |      |     |      |     |
| YF_005841883.1 | L   | SYVPLIPMNSSGR | VYGF          | EP      | VGVV             | ---       | MAAV       | VDVNE        | KTRE       | ISNL     | Q             | D           | FYIE         | FSI         | 174     |      |      |      |     |      |     |
| YF_930015.1    | M   | SAFIKLAPPHSV  | VYGHYM        | GAL     | HAIPV            | DWYR      | DAICK      | F            | EYLEK      |          |               |             |              |             | 168     |      |      |      |     |      |     |
| YF_001794902.1 | M   | SAFIKMAPPSL   | VYGHY         | ---     | KAL              | IAVM      | VWDYR      | DAID         | REL        | QYLEK    |               |             |              |             | 168     |      |      |      |     |      |     |
| YF_001056647.1 | M   | SAFIRLAPPSI   | VAYGHYM       | GAL     | HAIPV            | DWYR      | DRLLK      | F            | DFLEK      |          |               |             |              |             | 168     |      |      |      |     |      |     |
| YF_001153914.1 | M   | SAFIKLAPPSV   | VAYGHYL       | GAL     | HAIPV            | DWYR      | SILRF      | F            | NYLE       | QQQKA    |               |             |              |             | 172     |      |      |      |     |      |     |
| YF_005259057.1 | M   | SAFIKLAPPSV   | VAYGHYL       | GAL     | HAIPV            | DWYR      | SILRF      | F            | NYLE       | QQQKA    |               |             |              |             | 172     |      |      |      |     |      |     |
| NP_560628.1    | M   | SAFIKLAPPSI   | VAYGHYL       | GAL     | HALPV            | DWYK      | EVYLF      | F            | DYLEK      |          |               |             |              |             | 140     |      |      |      |     |      |     |
| YF_005085004.1 | M   | SAFIKLAPPSI   | VAYGHYM       | GAL     | HAIPV            | DWYR      | SYILK      | F            | DYLEK      |          |               |             |              |             | 168     |      |      |      |     |      |     |
| YF_004337001.1 | M   | SAFIALAPDSSA  | VYGHYK        | GAL     | HV               | IPV       | GKY        | ---          | KEIRE      | L        | K             | MEPC        |              |             | 166     |      |      |      |     |      |     |
| YF_004892291.1 | M   | SAFIALASDSSA  | VYGHYK        | GAL     | V                | IPV       | GAY        | ---          | REIK       | S        | L             | KFL         | KEC          |             | 169     |      |      |      |     |      |     |
| YF_008796927.1 | L   | APAIHALPDGGV  | VYGF          | EP      | CGV              | VVKA      | SVKVK      | LVEE         | I          | SMAT     |               |             |              |             | 168     |      |      |      |     |      |     |
| YF_003860570.1 | L   | TATIILIDHG    | I             | VYGF    | EP               | EST       | AIPI       | ---          | DKAK       | VDAIN    | F             | SQ          | FIR          | LSL         | GYKDLNV | 201  |      |      |     |      |     |
| YF_008071435.1 | L   | AVCAAAPTGSC   | LMYGF         | EP      | VGM              | LLK       | VD         | AA           | SSDR       | AKS      | L             | YS          | MEELN        |             | 160     |      |      |      |     |      |     |
| YF_007687666.1 | L   | PCVLHAPGAV    | VYGF          | EP      | VGVV             | ---       | RMK        | AVAT         | DGSS       | RKWA     | EE            | L           | GR           | MEELS       | 168     |      |      |      |     |      |     |
| YF_007713106.1 | L   | PCVLYAPGAV    | VYGF          | EP      | VGVV             | ---       | RMK        | AVAT         | DGL        | SKAY     | IEK           | L           | ES           | MEELI       | 171     |      |      |      |     |      |     |
| YF_001541769.1 | L   | PAVLAPAGNTG   | IYGLYT        | GYL     | HAIPV            | NEYK      | ILMK       | EL           | TL         | DR       | DEC           | TL          | RNC          | SV          | NYGWKNS | 200  |      |      |     |      |     |
| YF_003902647.1 | L   | PAVLLAPRGS    | VYGLYT        | GYL     | HAIP             | T         | DEY        | KL           | AMLK       | F        |               |             |              |             | 175     |      |      |      |     |      |     |
| YF_004244378.1 | L   | PAVLLAPKGS    | VYGLYT        | GYL     | HAIP             | V         | DEY        | K            | L          | AMF      | K             | F           |              |             | LMR     | PGNA | 174  |      |     |      |     |
| YF_001737971.1 | L   | FPAILPPEGWV   | VYGF          | EP      | VGVV             | ---       | GMV        | SV           | NI         | DR       | K             | ARE         | AMN          | L           | Q       | E    | FLPI | 167  |     |      |     |
| YF_023646.1    | L   | PIIFYDINTL    | VYGF          | EP      | VGM              | CIF       | INTE       | I            | K          | SM       | VD            | L           | RD           | L           | NG      | T    | 165  |      |     |      |     |
| YF_008142358.1 | L   | PIIFYADKNTV   | VYGF          | EP      | VGM              | YIK       | VN         | DEI          | K          | ER       | K             | E           | M            | E           | M       | YR   | NEQ  | 168  |     |      |     |
| NP_111003.1    | L   | PIIYKNTV      | IYGF          | EP      | VGM              | AL        | T          | V            | DD         | L        | R             | H           | V            | T           | E       | I    | AK   | MAIE | 166 |      |     |
| NP_394550.1    | L   | PIIYADLDTV    | IYGF          | EP      | VGM              | IL        | T          | V            | DF         | L        | K             | H           | V            | C           | E       | L    | SE   | MAIA | 156 |      |     |
| NP_341954.1    | L   | VPVLSANHGDI   | VYGF          | EP      | AGAV             | V         | IV         | N            | E          | M        | I             | K           | WR           | V           | R       | D    | L    | E    | KAI | VKEC | 179 |
| YF_005643228.1 | L   | VPVLSANHGDI   | VYGF          | EP      | AGAV             | V         | IV         | N            | E          | M        | I             | K           | WR           | V           | R       | D    | L    | E    | KAI | VKEC | 179 |
| YF_002915007.1 | L   | VPVLSANNGDI   | VYGF          | EP      | AGAV             | V         | IV         | N            | E          | M        | I             | K           | WR           | V           | R       | D    | L    | E    | KAV | VEEC | 179 |
| YF_002829735.1 | L   | VPVLSANNGDI   | VYGF          | EP      | AGAV             | V         | IV         | N            | E          | M        | I             | K           | WR           | V           | R       | D    | L    | E    | KAV | VEEC | 179 |
| YF_002843724.1 | L   | VPVLSANNGDI   | VYGF          | EP      | AGAV             | V         | IV         | N            | E          | M        | I             | K           | WR           | V           | R       | D    | L    | E    | KAV | VEEC | 179 |
| YF_005648862.1 | L   | VPVLSANNGDI   | VYGF          | EP      | AGAV             | V         | IV         | N            | E          | M        | I             | K           | WR           | V           | R       | D    | L    | E    | KAV | VEEC | 179 |
| YF_005646225.1 | L   | VPVLSANNGDI</ |               |         |                  |           |            |              |            |          |               |             |              |             |         |      |      |      |     |      |     |



Fig. S6

```

YF_004276.1 LAVPLAMHAPLGTV--LLYGGEG-EVWLLSITPAMKKRAEEF--TCFEVSTPTAREVFN----- 172
YF_001030096.1 LAVPLTEILPDGAV--LLYGGEG-EGLVICEVKNQLRANAKKLL--TYFVSL----- 161
YF_003893312.1 LAVPLVKIVPDGSA--VLYGGEG-EVWVKIVDEEARLADLF--SLEFADNSCE----- 166
YF_001043408.1 LAVPLVIAAPLSSI--VLYGGEG-EVWLRIVDDQAKTAARRLL--TQFTKTESPIPHN----- 168
YF_007250359.1 LAVPMVIAAPLGI--VLYGGEG-EVWLRITVTPGAQDTARAF--ERFIRSEE----- 163
YF_002465695.1 LAVPVLIAVDPGGF--LLYGGEG-EAVLCTVDQAKERARELL--ALFEQV----- 161
YF_001048149.1 LAVPLVLAAPDGAA--VLYGGEG-EVWLRIVDTAAKQEAASLL--SIFVRE----- 161
YF_006545055.1 LAVPLVLAAPSGAA--VLYGGEG-EVWLRIVDASAKREAETLL--KAFVRE----- 161
YF_002582924.1 LAAPAVLYAPLGSV--VLYGGEG-EVWLIKVTPECKRRCARLL--AKMEVVRDGD----- 180
YF_002958867.1 LAAPAVLYAPLGSV--VLYGGEG-EVWLIKVTPECKRRCARLL--AKMEVVRDGD----- 180
YF_002308299.1 LAAPAVLYAPEGSV--VLYGGEG-EVWLIKVTPECKLKCGRML--SKMEVVRDGD----- 177
YF_004762704.1 LAAPAVLYAPEGTL--VLYGGEG-EVWLIKVTPECKLKCGKML--SKMEVIHDGD----- 176
YF_006424759.1 LAAPAVLYAPPGSV--VLYGGEG-EVWLIKVTPECKLKCGKML--SKMEVVHDGD----- 176
YF_004072211.1 LAAPAVLYAPFNL--VLYGGEG-EVWLIKVTPECKRRCARLL--RKMEVVYDGD----- 180
YF_002993448.1 LAAPAVLYAPEGAL--VLYGGEG-EVWLIKVTPECKRRCARLL--RKMEVVHDGD----- 180
YF_008428988.1 LAAPAVLYAPEGTL--VLYGGEG-EVWLIKVTPECKRRCARLL--RKMEVVYDGD----- 180
YF_004624278.1 LAAPAVLYASPGTL--VLYGGEG-EVWLIKVTPECKRRCARLL--RKMEVVYDGD----- 178
YF_006354082.1 LAAPAVLYAPYNSY--VLYGGEG-EVWLIKVTPECKRRCARLL--RKMEVVYDGD----- 176
YF_004423817.1 LAAPAVLYAPYGA--VLYGGEG-EVWLIKVTPECKRRCARLL--REMEVVKNGDQNYRD----- 183
NF_577983.1 LAAPAVLYAPLGSF--VLYGGEG-EVWLIKVTPECKRRCARLL--RKMEVVYDGD----- 177
NF_006491333.1 LAAPAVLYAPLGSF--VLYGGEG-EVWLIKVTPECKRRCARLL--RKMEVVYDGD----- 177
NF_127361.1 LAAPAVLYAPIGTT--VLYGGEG-EVWLIKVTPECKRRCARLL--RKMEVVYDGD----- 179
NF_143738.1 LAAPAVLYAPLGAT--VLYGGEG-EVWLIKVTPECKRRCARLL--RKMEVVYDGD----- 179
Jpred 4 SS HHHHHHHH---E-EEEE---EEEEEE---HHHHHHHHHH-HHH-----
TK1697 LAAPAVLYAPLGTLL--VLYGGEG-EVWLIKVTPECKRRCARLL--ASMEVVRDGD-----
CONSENSUS 0.95 L-----Y-----G-----

```

**B**

```

YF_004457895.1 -----MIRKRYIVKCFYLL---EYRELSRPFGLLPS---TEKLLAYVN-----FEI--ITVQVYQL-----LNN-RVFLIVWKTENRSLQRFER--YI---WVNEPAIIRLJAMSYIK--ALL---SSFSVYTVGEEGLVIFATLYGGQGLVYGGPR--AGAVALDVEATYRNVLIIP--SRFVWEC--
TK1697 -----MIRKRYIVKCFYLL---EYRELSRPFGLLPS---TEKLLAYVN-----FEI--ITVQVYQL-----LNN-RVFLIVWKTENRSLQRFER--YI---WVNEPAIIRLJAMSYIK--ALL---SSFSVYTVGEEGLVIFATLYGGQGLVYGGPR--AGAVALDVEATYRNVLIIP--SRFVWEC--
Jpred 4 SS -----MIRKRYIVKCFYLL---EYRELSRPFGLLPS---TEKLLAYVN-----FEI--ITVQVYQL-----LNN-RVFLIVWKTENRSLQRFER--YI---WVNEPAIIRLJAMSYIK--ALL---SSFSVYTVGEEGLVIFATLYGGQGLVYGGPR--AGAVALDVEATYRNVLIIP--SRFVWEC--
CONSENSUS 0.95 -----MIRKRYIVKCFYLL---EYRELSRPFGLLPS---TEKLLAYVN-----FEI--ITVQVYQL-----LNN-RVFLIVWKTENRSLQRFER--YI---WVNEPAIIRLJAMSYIK--ALL---SSFSVYTVGEEGLVIFATLYGGQGLVYGGPR--AGAVALDVEATYRNVLIIP--SRFVWEC--
PDB: 3HE1 -----MIRKRYIVKCFYLL---EYRELSRPFGLLPS---TEKLLAYVN-----FEI--ITVQVYQL-----LNN-RVFLIVWKTENRSLQRFER--YI---WVNEPAIIRLJAMSYIK--ALL---SSFSVYTVGEEGLVIFATLYGGQGLVYGGPR--AGAVALDVEATYRNVLIIP--SRFVWEC--
PDB: 3HE1 SS -----MIRKRYIVKCFYLL---EYRELSRPFGLLPS---TEKLLAYVN-----FEI--ITVQVYQL-----LNN-RVFLIVWKTENRSLQRFER--YI---WVNEPAIIRLJAMSYIK--ALL---SSFSVYTVGEEGLVIFATLYGGQGLVYGGPR--AGAVALDVEATYRNVLIIP--SRFVWEC--
PDB: 2T17 -----MIRKRYIVKCFYLL---EYRELSRPFGLLPS---TEKLLAYVN-----FEI--ITVQVYQL-----LNN-RVFLIVWKTENRSLQRFER--YI---WVNEPAIIRLJAMSYIK--ALL---SSFSVYTVGEEGLVIFATLYGGQGLVYGGPR--AGAVALDVEATYRNVLIIP--SRFVWEC--
PDB: 2T17 SS -----MIRKRYIVKCFYLL---EYRELSRPFGLLPS---TEKLLAYVN-----FEI--ITVQVYQL-----LNN-RVFLIVWKTENRSLQRFER--YI---WVNEPAIIRLJAMSYIK--ALL---SSFSVYTVGEEGLVIFATLYGGQGLVYGGPR--AGAVALDVEATYRNVLIIP--SRFVWEC--
Catalytic aa -----MIRKRYIVKCFYLL---EYRELSRPFGLLPS---TEKLLAYVN-----FEI--ITVQVYQL-----LNN-RVFLIVWKTENRSLQRFER--YI---WVNEPAIIRLJAMSYIK--ALL---SSFSVYTVGEEGLVIFATLYGGQGLVYGGPR--AGAVALDVEATYRNVLIIP--SRFVWEC--

```
